# Supplementary material for: Single Site Suppressors of a Fission Yeast Temperature-Sensitive Mutant in cdc48 Identified by Whole Genome Sequencing
Source: PubMed Central journal article supplement (PMC4319823; doi:10.1371/journal.pone.0117779), 2015-02-06
Supplement: pone.0117779.s001.pdf [file pone.0117779.s001.pdf]

```

M. musculus      ---MASGADSK-----GDDLSTAILKQKNRPNRLIVDEAINEDNSVVS 40
S. pombe         MNAPSTMTDKKPEVEHLQGENPKDTYSAEDTATAILRKKRKPNSLVVDDATNDDNSVIT 60
                : : * . *                               : * : * * * * : : * . * * * * : :
M. musculus      LSQPKMDELQLFRGDTVLLKGGKRRREAVCIVLSDDTCSDEKIRMNRVVRNNLRVRLGDVI 100
S. pombe         LSSNTMETLQLFRGDTVVVKGKRRKDTVLIVLTDEEMEDGVARINRVVRNNLRVRLGDIV 120
                ** . . * : * * * * * * * : * * * * * : * * * * * : * * * * * * * * * * : :
M. musculus      SIQPCPDVKYGRIHVLPIDDTVEGITGNLFEVYLKPYFLEAYRPIRKGDIFLVRGGMRA 160
S. pombe         TINPCPDIKYAERISVLPLADTVEGLTGSLFDVYLKPYFVEAYRPIRKGDLFFVVRGSMRQ 180
                : * : * * * * : * . : * * * * : * * * * * : * . * * * * * * * * * * * * * * * * : * * * * . * *
M. musculus      VEFKVVETDPSYCIVAPDTVIHCEGEPIKREDEEESLNEVGYDDIGGCRKQLAQIKEMV 220
S. pombe         VEFKVVDVAPDEFGIVSQDTIIHWEGEPINREDEESSLAEVGYDDIGGCRRQMAQIRELV 240
                * * * * * : . * . : * * : * * : * * * * * * * * * * * * * * * * * * * * * * * * * * * * * *
M. musculus      ELPLRHPALFKAIGVKPPRGILLYGPPGTGKTLIARAVANETGAFFFLINGPEIMSKLAG 280
S. pombe         ELPLRHPQLFKSIGIKPPRGILMYGPPGTGKTLMARAVANETGAFFFLINGPEIMSKMAG 300
                * * * * * * * * * * * * * * * * * * * * * * * * * * * * * * * * * * * * * * * * * * * * * * * * *
                *
M. musculus      EESNLRKAFEEAEKNAPAIIFIDELDAIAPKREKTHGEVERRIVSQLLTMDGLKQRAH 340
S. pombe         EESNLRKAFEEAEKNSPAIIFIDEIDSIAPKREKTINGEVERRVVSQLLTMDGMKARSN 360
                * * * * * * * * * * * * * * * * * * * * * * * * * * * * * * * * * * * * * * * * * * * * * * * * *
M. musculus      VIVMAATNRPNSIDPALRRFGRFDREVDIGIPDATGRLEILQIHTKNMKLADDVDLEQVA 400
S. pombe         VVMAATNRPNSIDPALRRFGRFDREVDVGIPDPTGRLEILRIHTKNMKLADDVDLEQIA 420
                * : * * * * * * * * * * * * * * * * * * * * * * * * * * * * * * * * * * * * * * * * * * * * * * * *
M. musculus      NETHGHVGDALALCSEAALQAIRKKMDLIDLEDETIDAEVMNSLAVTMDDFRWALSQSN 460
S. pombe         AETHGVVGSDLASLCSEAAMQQIREKMMIDLDEDEIDAEVLDSLGVTMDNFRFALGSSN 480
                * * * * * : * * : * * * * * * * * * * * * * * * * * * * * * * * * * * * * * * * * * * * * * * * *
M. musculus      PSALRETVVEVPQVTWEDIGGLEDVKRELQELVQYPVEHPDKFLKFGMTPSKGVLFYGP 520
S. pombe         PSALRETVVEVPNVRWEDIGGLEEVKRELRETVQMPVMYAEKFLRFGVTPSKGVLFFGPP 540
                * * * * * * * * * * * * * * * * * * * * * * * * * * * * * * * * * * * * * * * * * * * * * * * *
M. musculus      GCGKTLLAKAIANECQANFISIKPELLTMWFGSEANVREIFDKARQAAPCVLFFDEL 580
S. pombe         GTGKTLLAKAIANECANFISVKGPELLSMWFGSESNVRDIFDKARAAAPCVVFLDEL 600
                * * * * * * * * * * * * * * * * * * * * * * * * * * * * * * * * * * * * * * * * * * * * * * * *
M. musculus      SIAKARGGNIGDGGGAADRVINQILTEMDGMSTKKNVFIIGATNRPDIIDPAILRPGRLD 640
S. pombe         SIAKARGASAGDSGGG-DRVVNQLLTEMDGVNSKKNVFIIGATNRPDQIDPALMRPGRLD 659
                * * * * * . * . * * . * * * * * * * * * * * * * * * * * * * * * * * * * * * * * * * * * * * * *
M. musculus      QLIYIPLPDEKSRVAILKANLRKSPVAKDVDLEFLAKMTNGFSGADLTEICQRACKLAIR 700
S. pombe         QLIYVPLPDEEARFSILQTQLRHTPVAEDVLRAVAKATHGFSGADLEFVVQRAVKLAIK 719
                * * * * * * * * * * * : * . : * * : * * : * * * * * * * * * * * * * * * * * * * * * * * * * * *
M. musculus      ESIESEIRRERERQTNPS-AMEVEEDDPVEIRRDHFEEAMRFARRSVSDNDIRKYEMFA 759
S. pombe         DSIEEDIKRENETGEAPADDVMDEDASVSQVQRHHVEEAMKMARRSVSDAEVRRYEAYA 779
                : * * . : * * . * * : : : * * . * . : * . * * * * * * * * * * * * * * * * * * * * * * *
M. musculus      QTLQQSRGFGSFRFPSGNQGGAGPSQSGGGTGGSVYTENDDDLYG 806
S. pombe         HQLLTSRGLTGFQFDSADSNTNGPSFGN-----DGADDLYA 815
                : * * * * . * * * * . . . * * * * * * * * * * * * * * * * * * * * * * * * * * * * * *
                STOP

```
